# Supplementary material for: Association of lipid metabolism-related metabolites with overweight/obesity based on the FTO rs1421085
Source: Royal Society of Chemistry journal article supplement (doi:10.1039/d3mo00112a), 2023-08-04
Supplement: d3mo00112a2.pdf [file d3mo00112a2.pdf]

## Supplementary Material

### **Association of lipid metabolism-related metabolites with overweight/obesity based on the FTO rs1421085**

Sabiha Farooq<sup>1</sup>, Sobia Rana<sup>\*2</sup>, Amna Jabbar Siddiqui<sup>2</sup>, Ayesha Iqbal<sup>3</sup>, Adil Anwar Bhatti<sup>2</sup>, Syed Ghulam Musharraf<sup>\* 1,2</sup>

*<sup>1</sup>H.E.J. Research Institute of Chemistry, International Center for Chemical and Biological Sciences, University of Karachi, Karachi-75270, Pakistan*

*<sup>2</sup>Dr. Panjwani Center for Molecular Medicine and Drug Research, International Center for Chemical and Biological Sciences, University of Karachi, Karachi-75270, Pakistan*

*<sup>3</sup>Department of Biomedical and Biological Sciences, Sohail University, Karachi -74000, Pakistan*

\*Corresponding authors. Tel.: +92 21 34824924-5; 4819010; fax: + 92 213 4819018-9.

E-mail address: [musharraf1977@yahoo.com](mailto:musharraf1977@yahoo.com); [molecularbiologist1@gmail.com](mailto:molecularbiologist1@gmail.com)

**Table S1: List of forty-two (42) identified metabolites**

| S. No. | Metabolites                         | <i>p</i> | <i>p</i> -value (Corrected) | FC (cases vs. control) |
|--------|-------------------------------------|----------|-----------------------------|------------------------|
| 1      | 1,3-Docosenamide                    | 7.55E-07 | 3.33E-05                    | 1.344                  |
| 2      | 2,3-Dihydroxypropyl stearate        | 1.00E-13 | 1.00E-13                    | -2.317                 |
| 3      | 2,5-Dimethylbenzaldehyde            | 2.89E-04 | 6.90E-03                    | 1.241                  |
| 4      | 2,6-Di-tert-butylphenol             | 1.22E-13 | 1.12E-11                    | 1.133                  |
| 5      | 2,6-Octadien-1-ol                   | 2.27E-03 | 3.22E-02                    | 1.200                  |
| 6      | 2-Methyl-9,10-dihydroanthracene     | 6.37E-04 | 1.17E-02                    | 1.204                  |
| 7      | 2-Methylpropan-1-ol                 | 1.42E-03 | 2.21E-02                    | 1.209                  |
| 8      | 2-Penten-2,4-diol                   | 4.65E-06 | 1.84E-04                    | 1.237                  |
| 9      | 3,4-Dihydro-2h-benzthiazine         | 2.18E-04 | 5.31E-03                    | 1.247                  |
| 10     | 3-Buten-2-one                       | 4.42E-07 | 2.03E-05                    | -1.352                 |
| 11     | 3-Pyridinecarboxamide               | 3.33E-05 | 1.10E-03                    | 1.281                  |
| 12     | 3-Pyridinol                         | 2.58E-07 | 1.26E-05                    | 1.320                  |
| 13     | 4,6-Dimethoxy-3-methylindolin-2-one | 5.56E-04 | 1.06E-02                    | 1.229                  |
| 14     | Acetamide                           | 1.78E-15 | 1.85E-13                    | 1.324                  |
| 15     | Benzenepropionic acid               | 3.64E-03 | 4.81E-02                    | 1.189                  |
| 16     | Diacetone alcohol                   | 1.85E-11 | 1.52E-09                    | 1.072                  |
| 17     | Diazirine                           | 2.01E-05 | 7.09E-04                    | 1.289                  |
| 18     | Eicosanoic acid                     | 3.86E-11 | 3.06E-09                    | 1.417                  |
| 19     | Ethenone                            | 1.31E-04 | 3.54E-03                    | 1.256                  |
| 20     | Ethylene, 1,1-diphenyl              | 1.18E-03 | 2.03E-02                    | 1.214                  |
| 21     | Geraniol                            | 1.00E-13 | 1.00E-13                    | 3.517                  |
| 22     | Geranyl tiglate                     | 1.04E-03 | 1.81E-02                    | 1.216                  |
| 23     | Glycerol                            | 2.81E-08 | 1.65E-06                    | -1.261                 |
| 24     | Heptadecane                         | 3.23E-04 | 7.31E-03                    | -1.24                  |
| 25     | Heptadecanoic acid                  | 1.58E-07 | 8.24E-06                    | 1.367                  |
| 26     | Hexadecane, 2,6,10,14-tetramethyl   | 3.15E-14 | 3.02E-12                    | 1.179                  |
| 27     | Hexadecanoic acid                   | 3.77E-08 | 2.17E-06                    | 1.076                  |
| 28     | Lavandulol                          | 1.79E-03 | 2.75E-02                    | -1.205                 |
| 29     | Myristic acid                       | 1.57E-13 | 1.38E-11                    | 1.027                  |
| 30     | n-Eicosane                          | 1.28E-04 | 3.49E-03                    | 1.247                  |
| 31     | Nicotinic acid                      | 5.56E-04 | 1.06E-02                    | 1.229                  |
| 32     | n-Pentadecanoic acid                | 1.00E-13 | 1.00E-13                    | 1.801                  |
| 33     | Phenylethanolamine                  | 1.82E-03 | 2.78E-02                    | -1.206                 |
| 34     | Phosphoric acid                     | 8.51E-05 | 2.41E-03                    | 1.204                  |
| 35     | Phthalic acid                       | 6.58E-04 | 1.20E-02                    | 1.216                  |
| 36     | Porphine                            | 1.00E-13 | 1.00E-13                    | 2.625                  |
| 37     | Stearic acid                        | 5.42E-07 | 2.44E-05                    | 1.345                  |
| 38     | Sucrose                             | 1.79E-07 | 8.94E-06                    | 1.366                  |
| 39     | Tetradecane                         | 1.16E-09 | 8.32E-08                    | -1.436                 |
| 40     | Thionicotinic acid                  | 3.48E-04 | 7.31E-03                    | 1.238                  |
| 41     | Triethanolamine                     | 3.51E-04 | 7.31E-03                    | 1.075                  |
| 42     | Urea                                | 1.96E-06 | 7.88E-05                    | 1.329                  |

Anthropometric and clinical characteristics were compared between the two groups (cases vs controls) by using Mann Whitney U test. Cases: obese/overweight; Controls: normal weight; FC: fold change; negative (-) sign shows down regulation in cases while positive (+) sign shows up-regulation in cases as compared to controls *p*-value < 0.05 was considered as statistically significant.
